# Supplementary material for: Comparison of clonal architecture between primary and immunodeficient mouse-engrafted acute myeloid leukemia cells
Source: PubMed Central journal article supplement (PMC8956585; doi:10.1038/s41467-022-29304-6), 2022-03-25
Supplement: 41467_2022_29304_MOESM1_ESM.pdf [file 41467_2022_29304_MOESM1_ESM.pdf]

## **Supplementary Information**

### **Comparison of clonal architecture between primary and immunodeficient mouse-engrafted acute myeloid leukemia cells**

Kawashima et al.

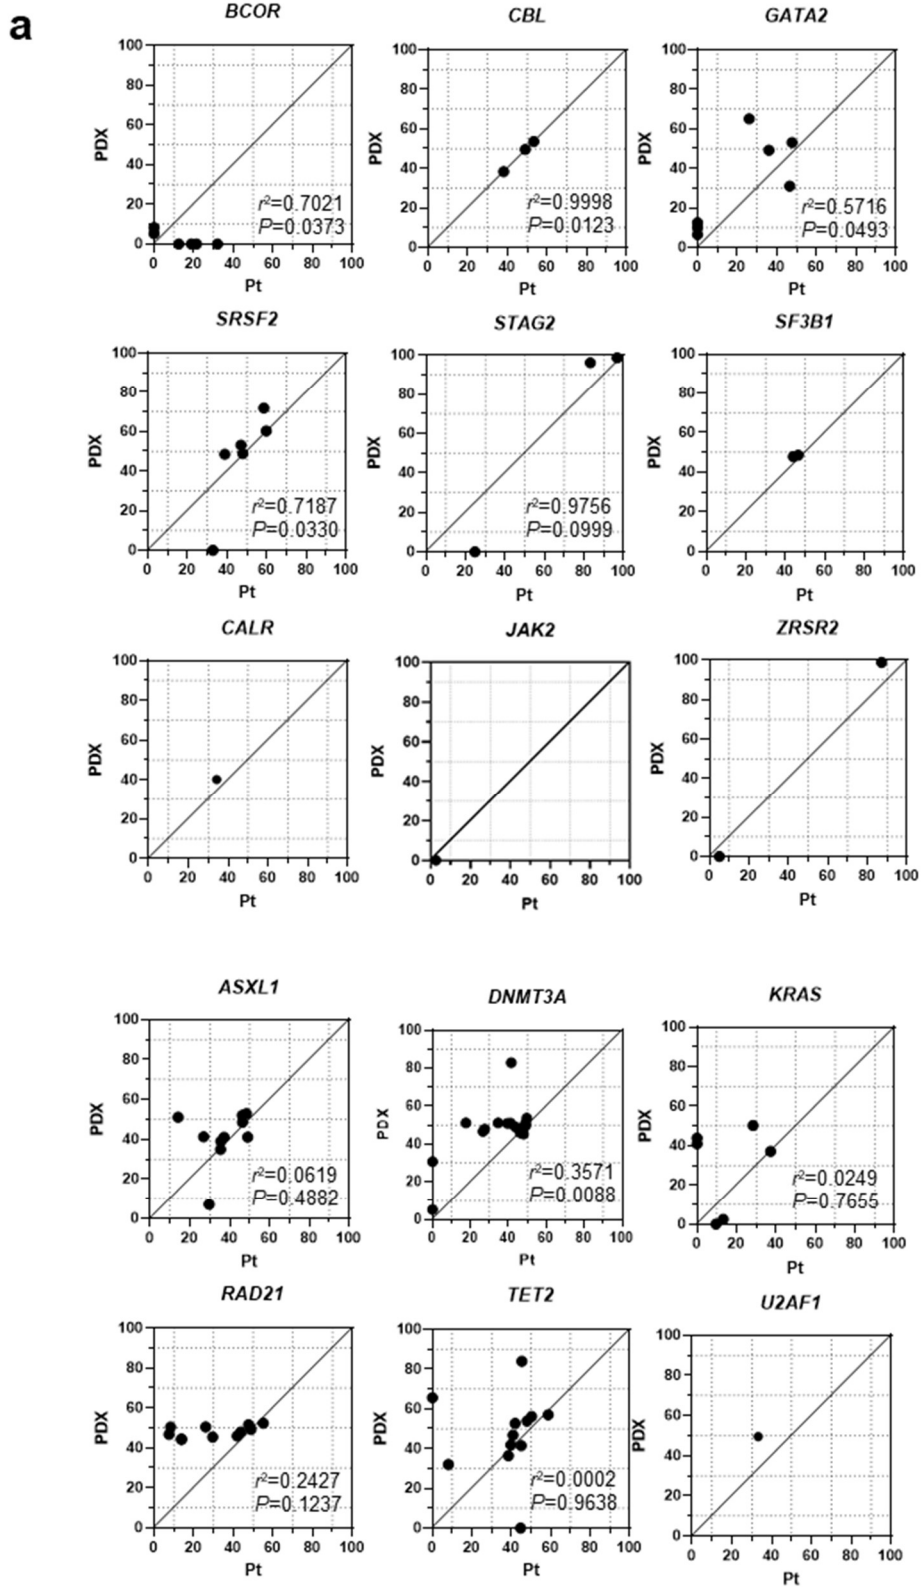

**Supplementary Figure 1. VAF changes between primary AML and corresponding PDX models.**

Scatter plots of VAF relationships between primary AML cells and P1-2 PDX BM cells in genes with (a) strong correlations and (b) weak correlations.

$R^2$  values and two-tailed  $P$ -values calculated using Pearson's correlation indicate the strength and significance, respectively, of the relationships.

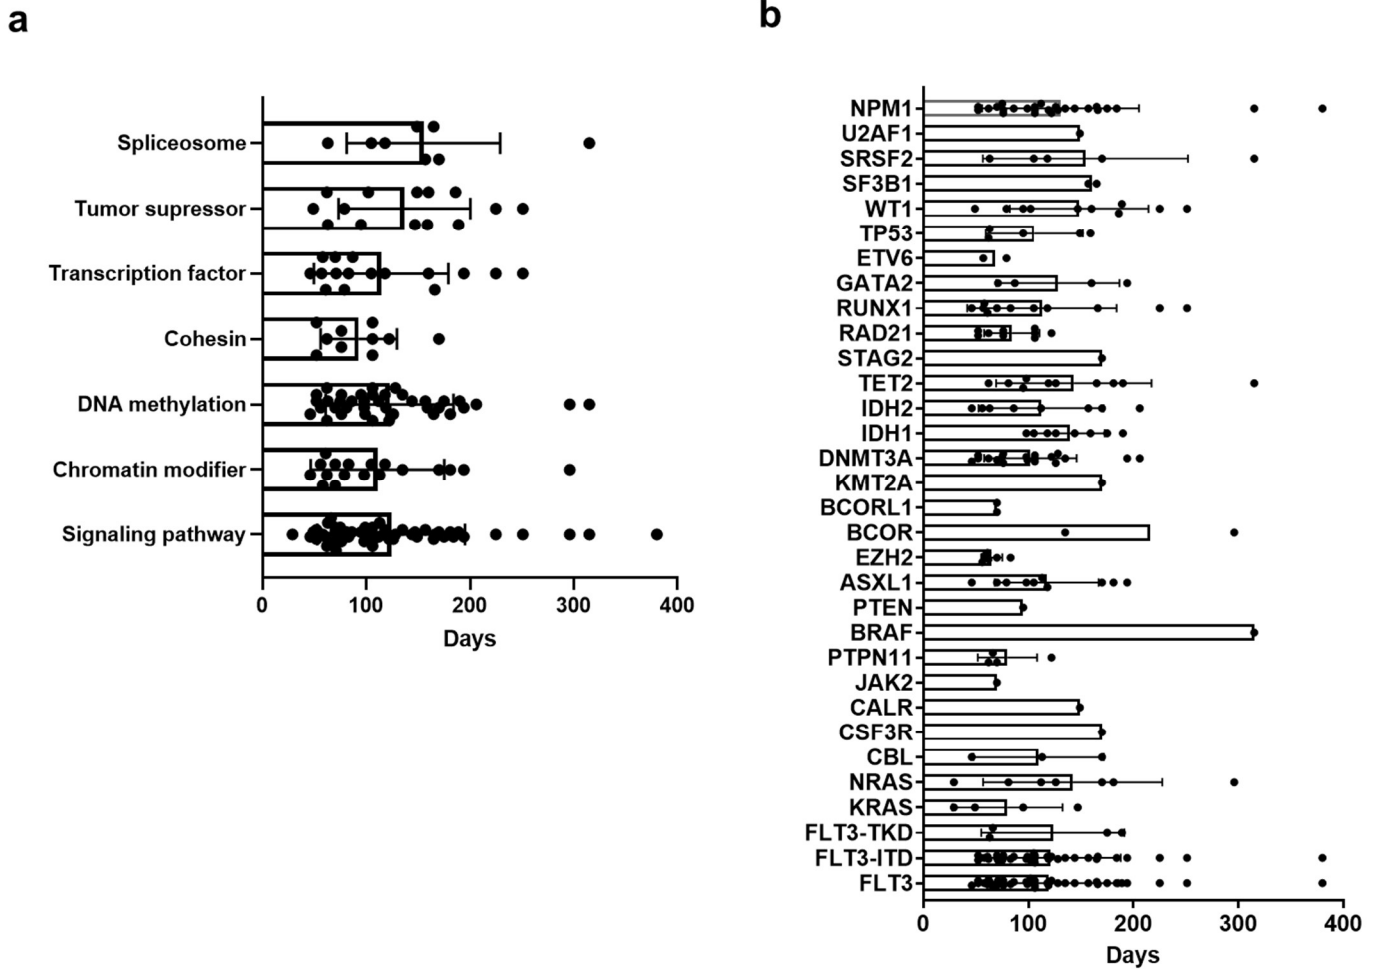

**Supplementary Figure 2. Time from transplantation to engraftment according to the mutated genes of transplanted AML cells.**

Duration from transplantation to engraftment in PDX according to genetic variants detected in transplanted primary AML cells shown in (a) functional groups (Signaling pathway,  $n=53$ ; Chromatin modifier,  $n=18$ ; DNA methylation,  $n=39$ ; Cohesin,  $n=10$ ; Transcription factor,  $n=16$ ; Tumor suppressor,  $n=14$ ; Spliceosome,  $n=8$  biologically independent samples) and (b) individual genes (*FLT3*,  $n=39$ ; *FLT3-ITD*,  $n=34$ ; *FLT3-TKD*,  $n=4$ ; *KRAS*,  $n=4$ ; *NRAS*,  $n=7$ ; *CBL*,  $n=3$ ; *CSF3R*,  $n=1$ ; *CALR*,  $n=1$ ; *JAK2*,  $n=1$ ; *PTPN11*,  $n=4$ ; *BRAF*,  $n=1$ ; *PTEN*,  $n=1$ ; *ASXL1*,  $n=10$ ; *EZH2*,  $n=6$ ; *BCOR*,  $n=2$ ; *BCORL1*,  $n=2$ ; *KMT2A*,  $n=1$ ; *DNMT3A*,  $n=19$ ; *IDH1*,  $n=8$ ; *IDH2*,  $n=8$ ; *TET2*,  $n=10$ ; *STAG2*,  $n=1$ ; *RAD21*,  $n=9$ ; *RUNX1*,  $n=11$ ; *GATA2*,  $n=4$ ; *ETV6*,  $n=2$ ; *TP53*,  $n=5$ ; *WT1*,  $n=10$ ; *SF3B1*,  $n=2$ ; *SRSF2*,  $n=5$ ; *U2AF1*,  $n=1$ ; *NPM1*,  $n=26$  biologically independent samples). Data are presented as mean values  $\pm$  standard deviations.

a.

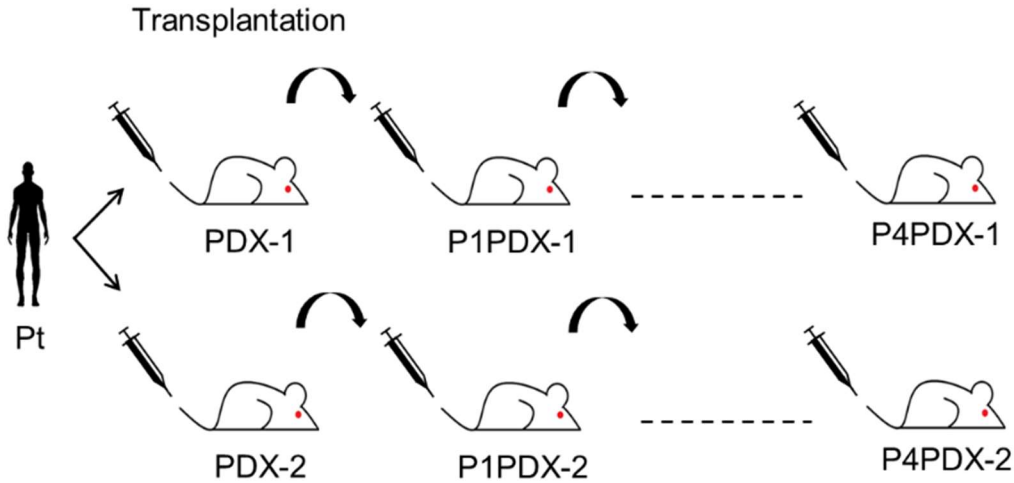

b.

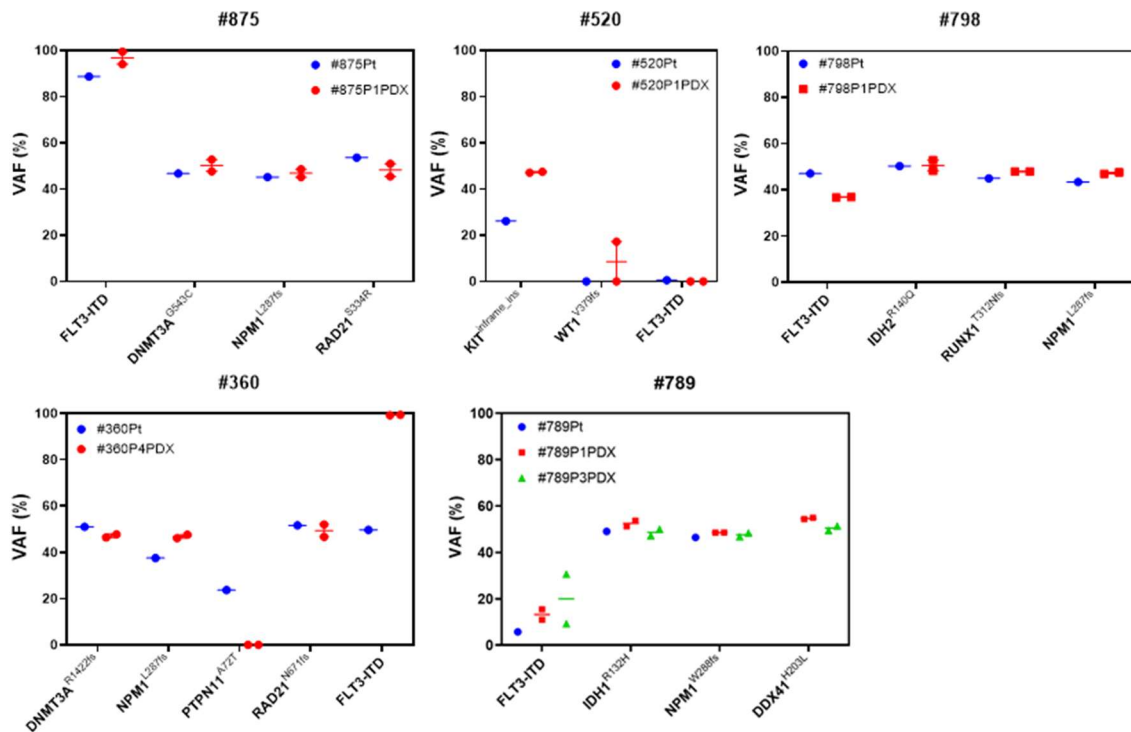

**Supplementary Figure 3. VAF changes of somatic mutations in duplicated AML-PDX models.**

(a) Experimental design. Fresh mononuclear cells isolated from primary AML cells were intravenously injected into 2 NOG mice and serially transplanted into each line when human CD45+ cells were engrafted.

(b) Dot plots show the VAF of mutated genes in primary AML cells and separately propagated PDX BM cells. Bars indicate the average of the duplicated PDX models.

**a.**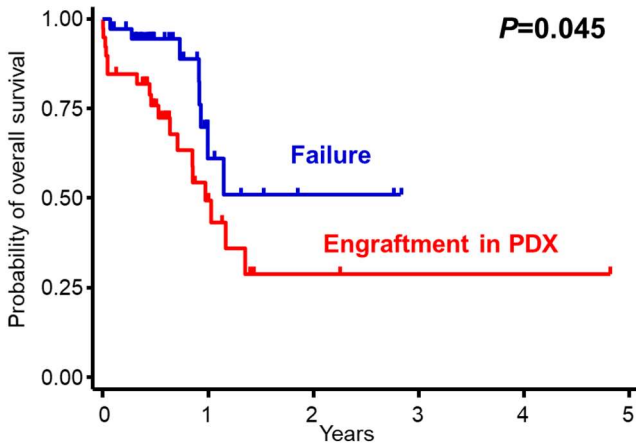**b.**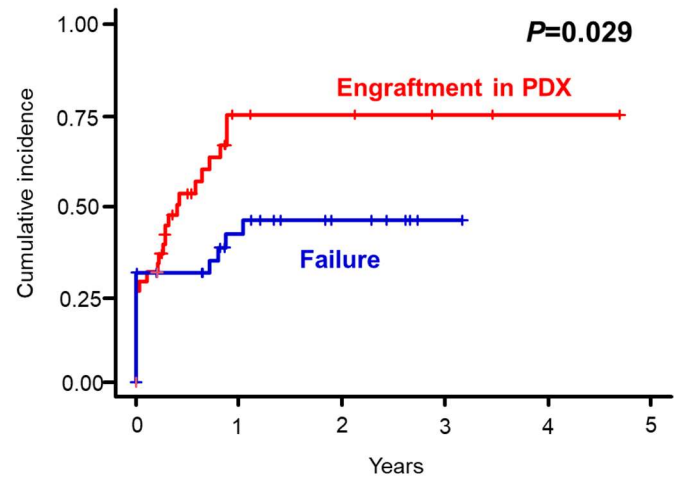

**Supplementary Figure 4. Overall survival of AML patients according to the establishment of AML-PDX.**

(a) Kaplan-Meier estimates of overall survival and (b) Cumulative incidence of relapse in 76 newly diagnosed AML patients according to the engraftment status in NOG mice. Two-sided P-values were estimated from the Log-rank test in (a) and Gray's test in (b).

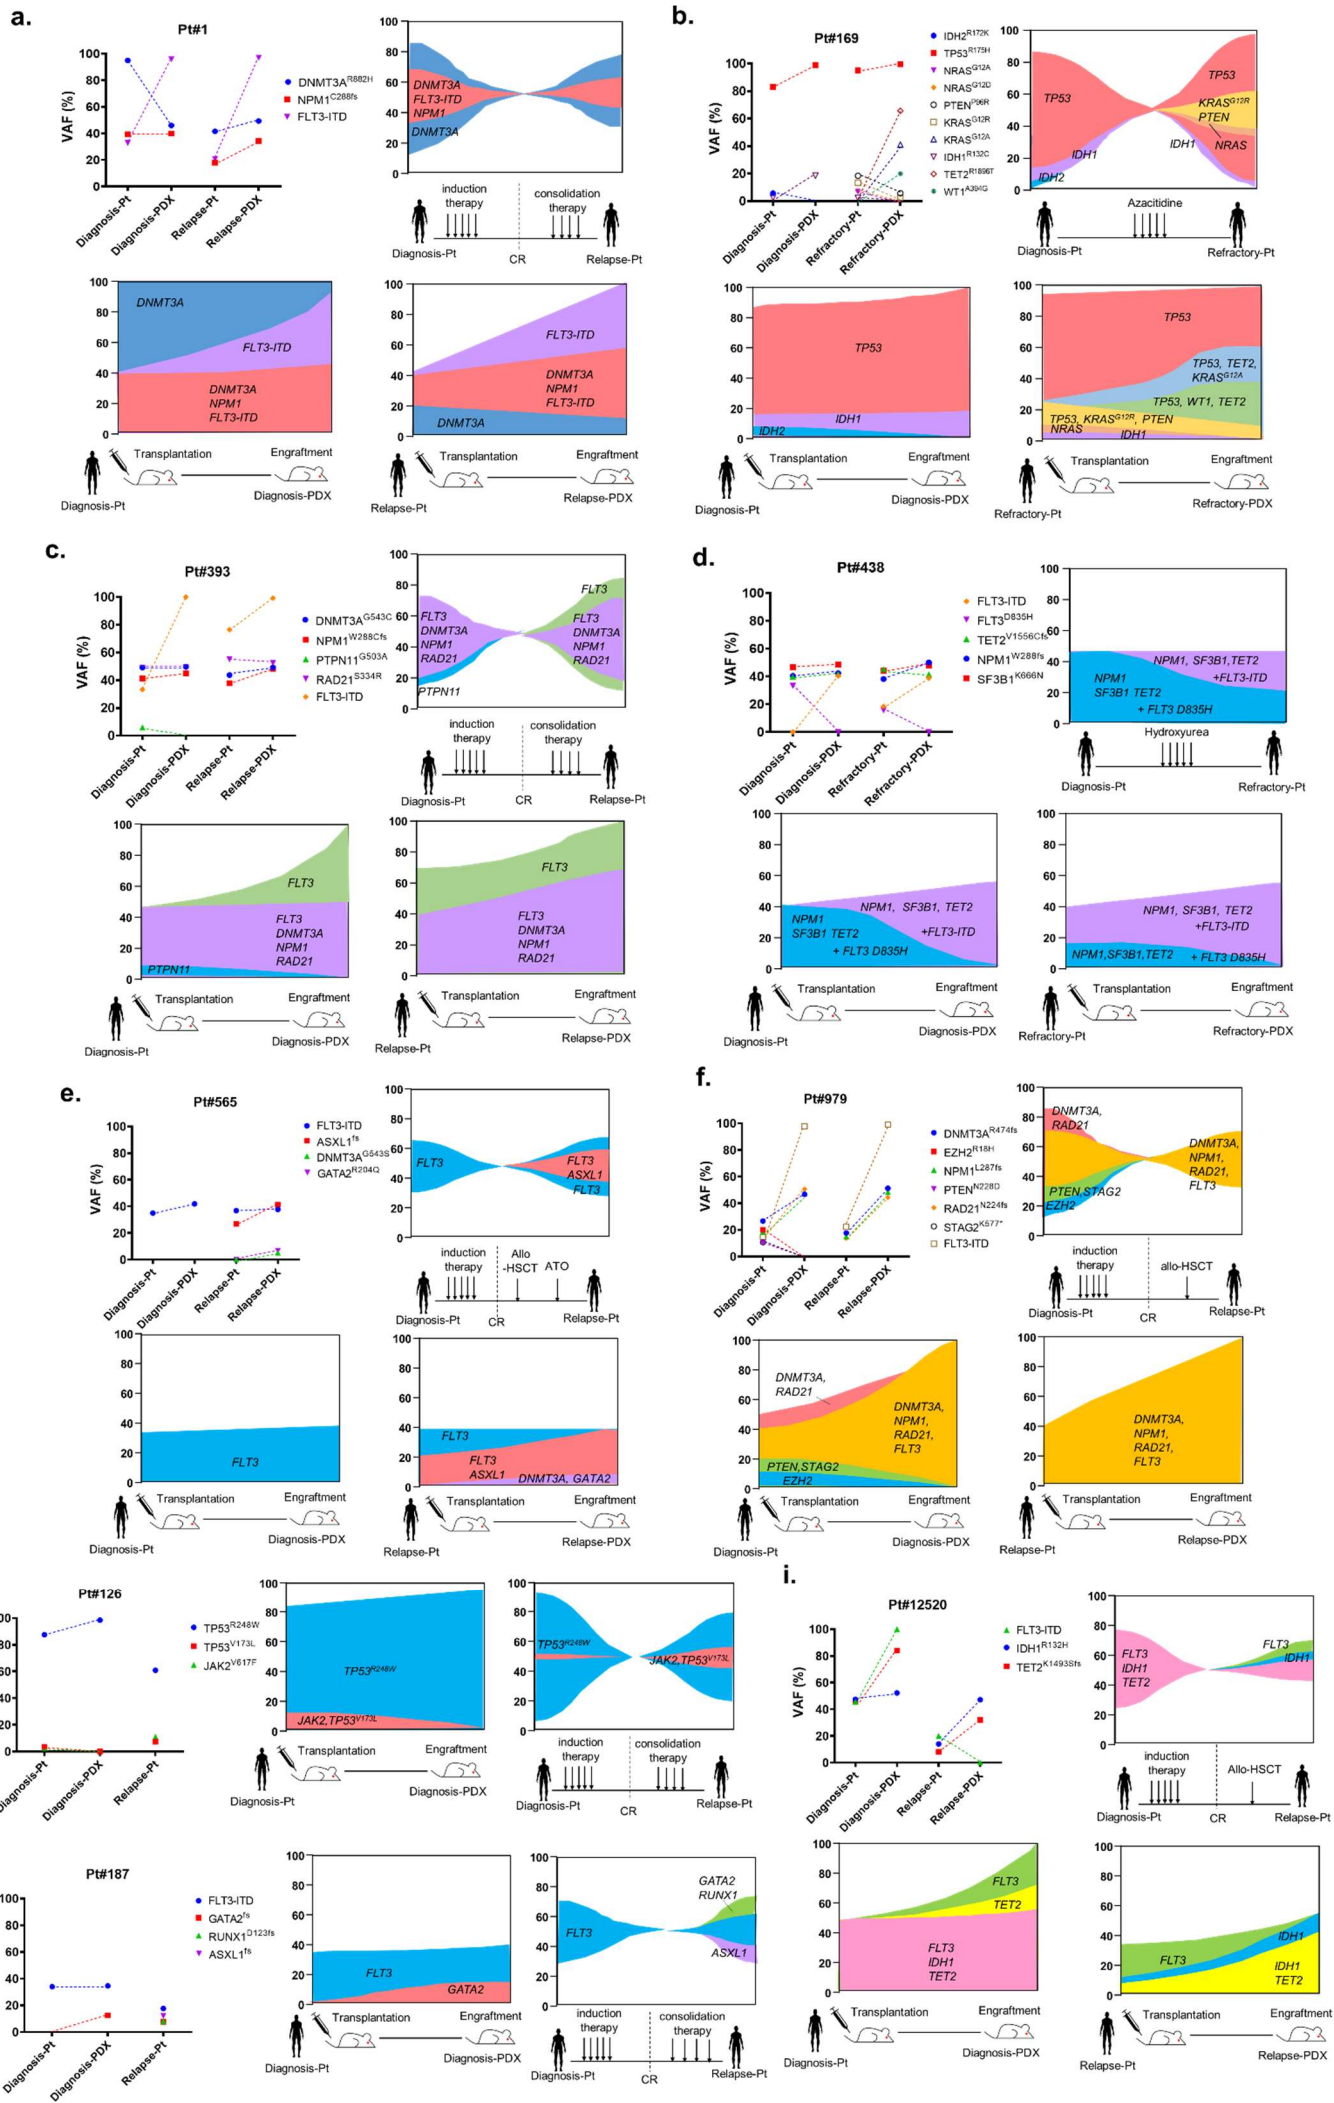

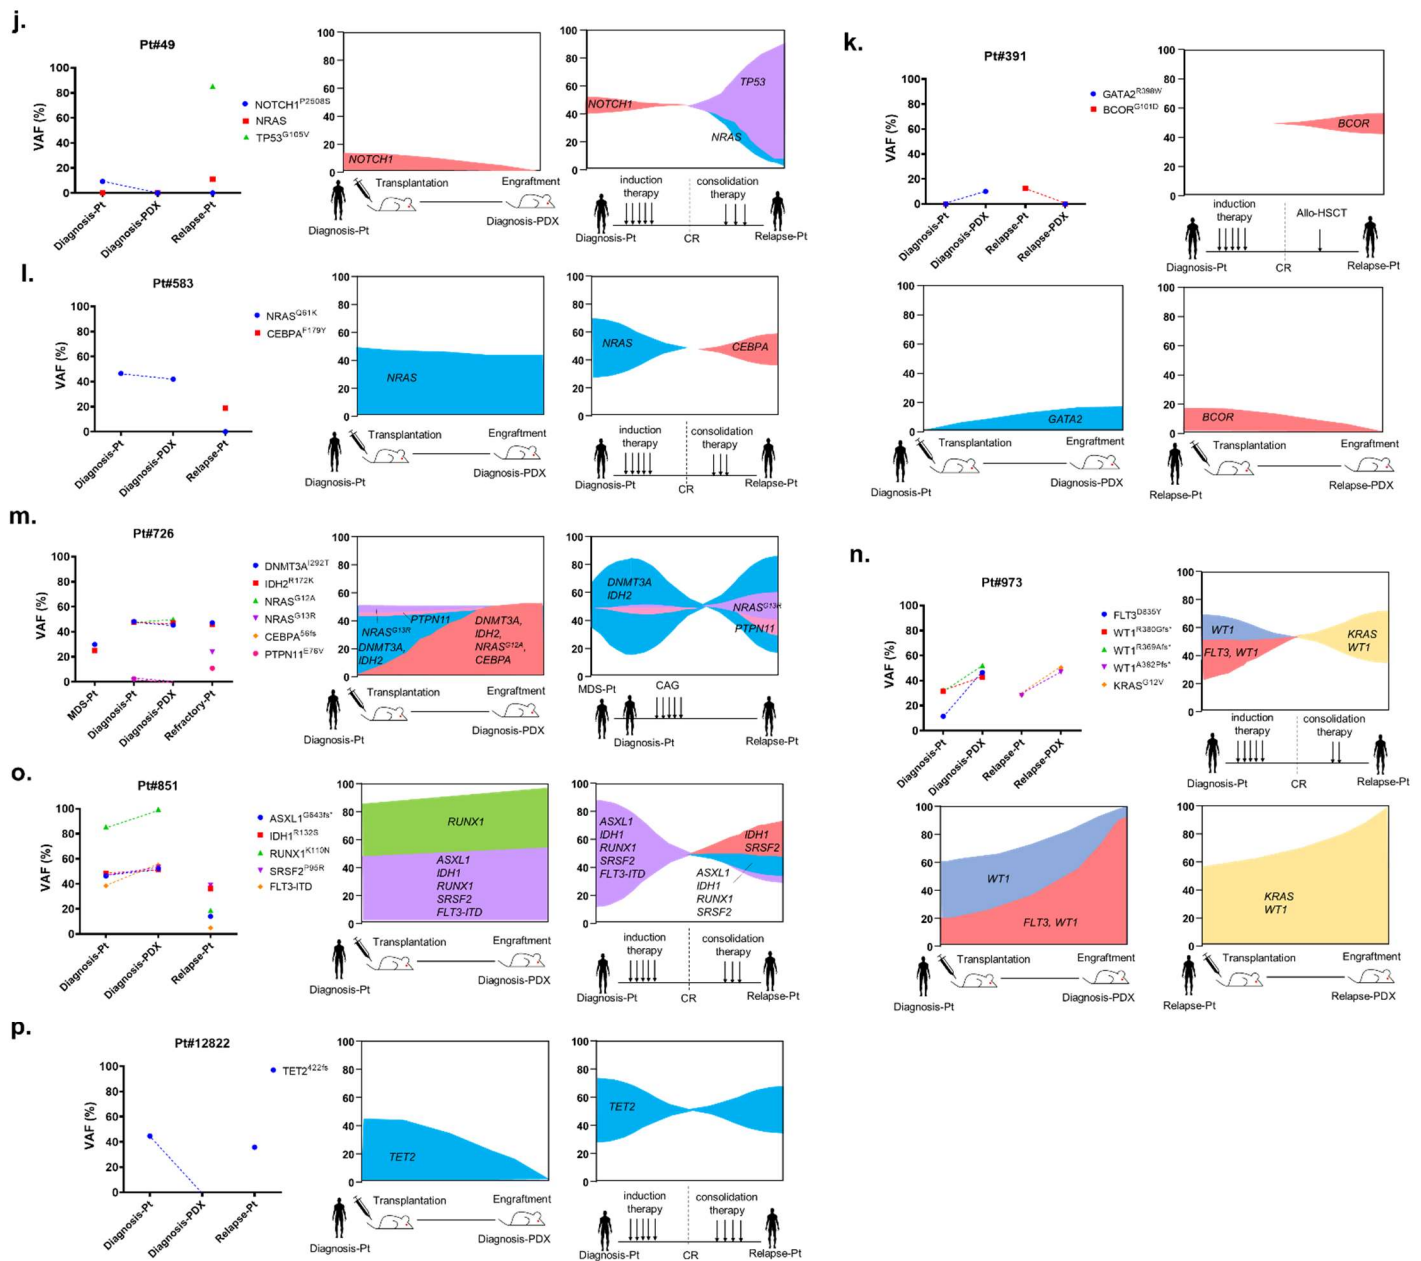

**Supplementary Figure 5. Serial mutational spectrum and clonal changes in AML patients and their PDX models.**

In each patient, clonal changes in the clinical course and PDX engraftment are shown in the fish plot format. Expanded subclones in PDX generated from AML samples at diagnosis (Diagnosis-PDX) were predictively consistent with the dominant clones at relapse/refractory (Relapse/refractory-Pt) in (a-i) and inconsistent in (j-p).



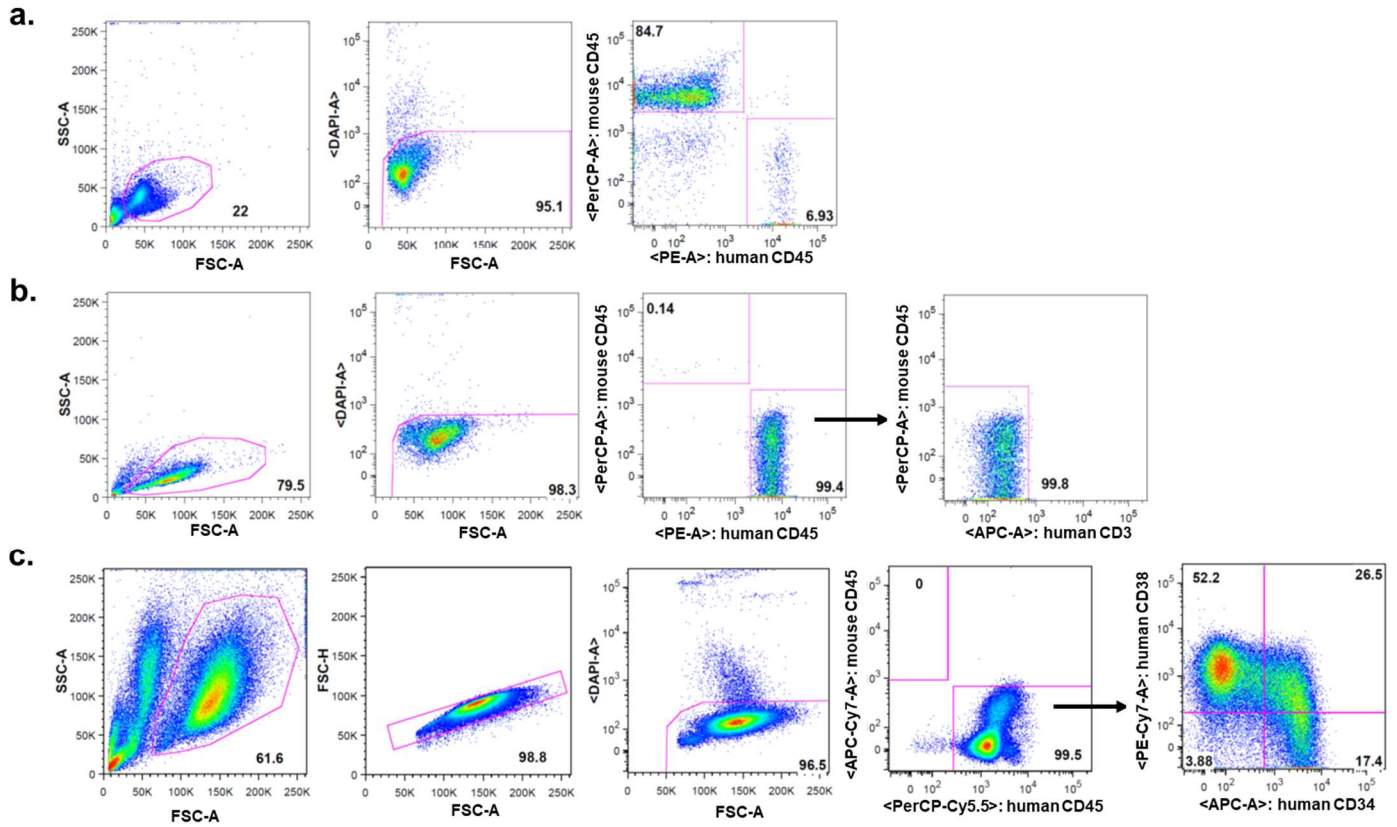

### Supplementary Figure 6. Gating strategy for flow cytometry.

AML engraftment was assessed using the percentage of mouseCD45<sup>-</sup>humanCD45<sup>+</sup> cells within the live cell compartment through sequential gating in (a) the PB of PDX and that of mouseCD45<sup>-</sup>humanCD45<sup>+</sup>CD3<sup>-</sup> cells in (b) the BM of PDX. (c) The percentages of CD34<sup>-</sup> and CD38<sup>-</sup> expression were further assessed in the human CD45<sup>+</sup> fraction of primary and PDX AML cells.



**Supplementary Table 1. Analyzed gene list**

|        |          |       |        |       |
|--------|----------|-------|--------|-------|
| ABL1   | CEBPA    | HRAS  | MYD88  | SF3B1 |
| ASXL1  | CSF3R    | IDH1  | NOTCH1 | SMC1A |
| ATRX   | CUX1     | IDH2  | NPM1   | SMC3  |
| BCOR   | DNMT3A   | IKZF1 | NRAS   | SRSF2 |
| BCORL1 | ETV6/TEL | JAK2  | PDGFRA | STAG2 |
| BRAF   | EZH2     | JAK3  | PHF6   | TET2  |
| CALR   | FBXW7    | KDM6A | PTEN   | TP53  |
| CBL    | FLT3     | KIT   | PTPN11 | U2AF1 |
| CBLB   | GATA1    | KRAS  | RAD21  | WT1   |
| CBLC   | GATA2    | MLL   | RUNX1  | ZRSR2 |
| CDKN2A | GNAS     | MPL   | SETBP1 |       |

**Supplementary Table 2. CD34 and CD38 expression in paired primary and PDX AML cells**

| UPN | Patient        |                |                |                | PDX            |                |                |                | alteration |
|-----|----------------|----------------|----------------|----------------|----------------|----------------|----------------|----------------|------------|
|     | CD34+<br>CD38- | CD34+<br>CD38+ | CD34-<br>CD38+ | CD34-<br>CD38- | CD34+<br>CD38- | CD34+<br>CD38+ | CD34-<br>CD38+ | CD34-<br>CD38- |            |
| 7   | -              | -              | +++            | +              | -              | -              | ++++           | +              | concordant |
| 49  | -              | -              | ++++           | -              | -              | -              | ++++           | -              | concordant |
| 137 | -              | -              | ++++           | +              | -              | -              | ++++           | +              | concordant |
| 187 | +              | -              | -              | ++++           | +              | -              | -              | ++++           | concordant |
| 469 | +              | -              | -              | ++++           | -              | -              | -              | ++++           | concordant |
| 606 | +              | ++             | ++             | +              | +              | +++            | ++             | +              | concordant |
| 677 | -              | +              | ++++           | +              | -              | -              | ++++           | +              | concordant |
| 764 | -              | -              | +++            | +              | -              | -              | ++             | +              | concordant |
| 789 | -              | -              | ++++           | +              | -              | -              | ++++           | +              | concordant |
| 1   | +              | ++             | +++            | +              | -              | -              | ++++           | +              | discordant |
| 132 | ++             | +              | +              | +              | -              | -              | +++            | +              | discordant |
| 252 | +              | ++             | ++             | +              | +              | +              | ++             | +              | discordant |
| 393 | +              | +              | ++             | +              | -              | -              | +++            | +              | discordant |
| 396 | +              | +              | +++            | +              | -              | ++             | ++             | +              | discordant |
| 412 | -              | -              | +              | +++            | -              | -              | +++            | +              | discordant |
| 439 | ++             | ++             | +              | -              | -              | +              | ++++           | -              | discordant |
| 463 | ++             | ++             | +              | -              | -              | +              | +++            | -              | discordant |
| 520 | +              | +++            | +              | -              | -              | +++            | +              | -              | discordant |
| 573 | -              | -              | +              | +++            | -              | -              | ++++           | +              | discordant |
| 583 | +              | +++            | +              | -              | +              | ++             | ++             | +              | discordant |
| 624 | ++             | +              | +              | +              | -              | -              | ++++           | +              | discordant |
| 642 | -              | ++             | +              | +              | -              | ++++           | +              | -              | discordant |
| 664 | +              | +              | +++            | +              | -              | -              | ++++           | -              | discordant |
| 696 | +              | +              | ++             | +              | -              | -              | ++++           | -              | discordant |
| 760 | +              | ++             | ++             | +              | +              | ++             | +              | +              | discordant |
| 786 | ++++           | -              | -              | -              | +++            | +              | +              | +              | discordant |
| 798 | -              | -              | +              | +++            | -              | -              | +++            | ++             | discordant |
| 979 | +              | +              | ++++           | +              | -              | -              | ++++           | +              | discordant |
| 999 | +              | ++             | +              | +              | +              | +              | +++            | +              | discordant |

++++ ≤ 100%, >75% +++ ≤ 75%, >50% ++ ≤ 50%, >25% + ≤ 25%

**Supplementary Table 3. Genetic variants engrafted into AML PDX models**

| Gene          | SNV | Frameshift | Inframe indel | Total |
|---------------|-----|------------|---------------|-------|
| <i>FLT3</i>   | 7   | 0          | 35            | 42    |
| <i>NPM1</i>   | 0   | 26         | 0             | 26    |
| <i>DNMT3A</i> | 11  | 8          | 0             | 19    |
| <i>RUNX1</i>  | 7   | 4          | 2             | 13    |
| <i>WT1</i>    | 4   | 8          | 0             | 12    |
| <i>RAD21</i>  | 3   | 8          | 0             | 11    |
| <i>TET2</i>   | 3   | 8          | 0             | 11    |
| <i>ASXL1</i>  | 2   | 8          | 0             | 10    |
| <i>NRAS</i>   | 9   | 0          | 0             | 9     |
| <i>IDH1</i>   | 8   | 0          | 0             | 8     |
| <i>IDH2</i>   | 8   | 0          | 0             | 8     |
| <i>GATA2</i>  | 6   | 1          | 0             | 7     |
| <i>TP53</i>   | 6   | 1          | 0             | 7     |
| <i>CEBPA</i>  | 0   | 3          | 2             | 5     |
| <i>EZH2</i>   | 5   | 0          | 0             | 5     |
| <i>KRAS</i>   | 5   | 0          | 0             | 5     |
| <i>SRSF2</i>  | 3   | 0          | 2             | 5     |
| <i>PTPN11</i> | 4   | 0          | 0             | 4     |
| <i>CBL</i>    | 2   | 0          | 1             | 3     |
| <i>BCOR</i>   | 2   | 0          | 0             | 2     |
| <i>BCORL1</i> | 2   | 0          | 0             | 2     |
| <i>ETV6</i>   | 1   | 1          | 0             | 2     |
| <i>SF3B1</i>  | 2   | 0          | 0             | 2     |
| <i>STAG2</i>  | 1   | 1          | 0             | 2     |
| <i>ABL1</i>   | 1   | 0          | 0             | 1     |
| <i>BRAF</i>   | 1   | 0          | 0             | 1     |
| <i>CALR</i>   | 0   | 1          | 0             | 1     |
| <i>CSF3R</i>  | 1   | 0          | 0             | 1     |
| <i>KIT</i>    | 1   | 0          | 0             | 1     |
| <i>KMT2A</i>  | 1   | 0          | 0             | 1     |
| <i>MPL</i>    | 1   | 0          | 0             | 1     |
| <i>PTEN</i>   | 1   | 0          | 0             | 1     |
| <i>SETBP1</i> | 1   | 0          | 0             | 1     |
| <i>U2AF1</i>  | 1   | 0          | 0             | 1     |
| <i>ZRSR2</i>  | 1   | 0          | 0             | 1     |
| Total         | 111 | 78         | 42            | 231   |

**Supplementary Table 4. Engraftment Latency**

| Variables               |                        | Median (days) | (range)   | <i>P</i> -value* |       |
|-------------------------|------------------------|---------------|-----------|------------------|-------|
| Age                     | >= 65 years            | 104           | (46-330)  | 0.863            |       |
|                         | < 65 years             | 111           | (27-380)  |                  |       |
| Disease                 | de novo AML            | 108           | (27-380)  | 0.647            |       |
|                         | FAB classification     |               |           |                  |       |
|                         | M0                     | 47.5          | (46-49)   |                  | 0.077 |
|                         | M1                     | 137.5         | (98-190)  |                  |       |
|                         | M2                     | 158.5         | (46-380)  |                  |       |
|                         | M3                     | 74.5          | (34-293)  |                  |       |
|                         | M4                     | 91            | (27-362)  |                  |       |
|                         | M5                     | 68            | (29-173)  |                  |       |
|                         | M6                     | 113           | NA        |                  |       |
|                         | AML with MRC           | 91            | (45-206)  |                  |       |
| tAML from MPN           | 154.5                  | (62-187)      |           |                  |       |
| AL of ambiguous lineage | 111.5                  | (105-118)     |           |                  |       |
| CML-BC                  | 79                     | NA            |           |                  |       |
| Graft source            | BM                     | 112           | (29-362)  | 0.247            |       |
|                         | PB                     | 104.5         | (27-380)  |                  |       |
| Sample                  | Diagnosis              | 138           | (9-362)   | 0.001            |       |
|                         | Relapse                | 102           | (45-380)  |                  |       |
|                         | Refractory             | 76            | (27-159)  |                  |       |
| Cytogenetic risk        | Favorable              | 104.5         | (34-296)  | 0.935            |       |
|                         | Intermediate           | 112.5         | (27-330)  |                  |       |
|                         | Poor                   | 106           | (45-362)  |                  |       |
| ELN risk category       | Favorable              | 161           | (106-330) | 0.036            |       |
|                         | Intermediate           | 126           | (27-196)  |                  |       |
|                         | Adverse                | 104           | (45-362)  |                  |       |
| Infused cell count      | >= 5 x 10 <sup>6</sup> | 106           | (27-380)  | 0.451            |       |
|                         | < 5 x 10 <sup>6</sup>  | 128.5         | (70-206)  |                  |       |
| infused blast %         | >= 60%                 | 115.5         | (27-362)  | 0.892            |       |
|                         | < 60%                  | 102.5         | (45-330)  |                  |       |
|                         | unknown                | 112           | (29-380)  |                  |       |

\*Chi-square test for Graft source, Fisher's exact test for other categorical data and the Mann-Whitney U test for continuous variables.

**Supplementary Table 5. Characteristics of patients at diagnosis and relapse/refractory (R/R)**

| UPN   | Diagnosis                                                | FAB | BM Blast at diagnosis (%) | PB Blast at diagnosis (%) | Karyotype at diagnosis                                                                                                                                                                                                                                                  | BM Blast at R/R (%) | PB Blast at R/R (%) | Karyotype at R/R                                                                                                                                                                                                                                                                  | Treatment before R/R  | CR duration (days) |
|-------|----------------------------------------------------------|-----|---------------------------|---------------------------|-------------------------------------------------------------------------------------------------------------------------------------------------------------------------------------------------------------------------------------------------------------------------|---------------------|---------------------|-----------------------------------------------------------------------------------------------------------------------------------------------------------------------------------------------------------------------------------------------------------------------------------|-----------------------|--------------------|
| 1     | <i>de novo</i> AML                                       | M5b | 80                        | 91                        | Normal                                                                                                                                                                                                                                                                  | 18                  | 0                   | 46,XX,add(3)(q11.2)[2]/46,XX[18]                                                                                                                                                                                                                                                  | Consolidation therapy | 155                |
| 28    | <i>de novo</i> AML                                       | M2  | 28.5                      | 2                         | Normal                                                                                                                                                                                                                                                                  | NE                  | 86                  | Normal                                                                                                                                                                                                                                                                            | Consolidation therapy | 39                 |
| 49    | <i>de novo</i> AML                                       | M5  | 85                        | 12.5                      | 49,XY,t(9;11)(p22;q23)                                                                                                                                                                                                                                                  | 97.5                | 14                  | 80~90<3n>,XXY,+Y,add(1)(p13),;add(1)(q21),+3,+3,+5,+7,+8,+8,+add(8)(q24),+9,t(9;11)(p22;q23)x2,add(10)(q22),+11,+16,del(17)(p11.2),+18,+19,+20,+22,+3~4mar[cp11]/46,XY[4]                                                                                                         | Consolidation therapy | 110                |
| 126   | ET transformed AML                                       |     | 21.5                      | 22                        | 43,XX,del(5)(q?),add(11)(p15),add(12)(p11.2),del(13)(q12q14),del(14)(q22q24),-17,-18,add(21)(q22),-22[1]/43, idem,-add(11),+add(11)(q23)[3]/43, idem,-add(11),+der(11)t(11;?)p15q23;?)9/41~44,XX,del(5),-11,add(12),del(13),del(14),-17,-18,add(21),-22,+r,+0~2mar[cp4] | 36                  | 5                   | 43,XX,del(5)(q?),der(11)t(11;?)p15q23;?),add(12)(p11.2),del(13)(q13q14),del(14)(q22q24),-17,-18,add(21)(q22),-22[11]/43, idem,+add(11)(q23),-der(11)t(11;?),-15,+mar[1]/40~43,XX,del(5),der(11)add(11)(p15)add(11)(q239,add(12),del(13),del(14),-17,-18,add(21),-22[cp6]/46,XX[1] | Consolidation therapy | 213                |
| 169   | MDS overt AML                                            |     | 22                        | 19                        | 44,XX,add(4)(q12),-5,-7,der(12)t(4;12)(q12;p11.2),-15,-18,+der(?)t(15;?)q22,mar[12]/44, idem,add(9)(p22),-13,-17,+2mar[2]/42, idem,add(8)(q24),-16,-20[1]                                                                                                               | 14.5                | 9                   | 46,xx,add(2)(q33),add(4)(q12)-5,-7,add(12)(p11.2),der(12)t(4;12)(q12;p11.2),add(4)(q31),-15,-18,der(?)t(15;?)q22,+mar[15]/44, idem,add(1)(q21),der(2)add(2)(p21)add(2)(q31),+add8[12](p11.2)-der(12)t(4;12)(add(4)[5]                                                             | Azacididine           | NA                 |
| 187   | <i>de novo</i> APL                                       | M3  | 100                       | 88                        | 46,XY,t(7;14)(q22;q32),t(15;17)(q22;q21)[20]                                                                                                                                                                                                                            | NE                  | 57                  | NE                                                                                                                                                                                                                                                                                | Consolidation therapy | 236                |
| 266   | <i>de novo</i> AML                                       | M2  | 69                        | 87                        | 46,XY,add(9)(q13)[4]/46,XY[16]                                                                                                                                                                                                                                          | 50.5                | 5                   | 46,XY,add(9)(q13)[2]/46, idem,add(1)(p34)[4]/46,XY[14]                                                                                                                                                                                                                            | Consolidation therapy | 321                |
| 391   | MDS overt AML                                            |     | 32.5                      | 10                        | 46,XX,t(11;19)(q23;q13.1)                                                                                                                                                                                                                                               | 58                  | 22                  | 46,XX,add(1)(p36.1),add(4)(q21),del(6)(p21),add(9)(p13),add(10)(q22),t(11;19)(q23;p13.1),?del(12)(p13),-14,add(17)(p11.2),-18,+2mar[18]/46,XX[2]                                                                                                                                  | allo-HSCT             | 405                |
| 393   | <i>de novo</i> AML                                       | M4  | 39.2                      | 24                        | Normal                                                                                                                                                                                                                                                                  | 75                  | 62                  | 46,XX,t(1;15)(p32;q11.2)[3]/46,XX[17]                                                                                                                                                                                                                                             | Consolidation therapy | 148                |
| 438   | <i>de novo</i> AML                                       | M4  | NE                        | 31                        | Normal                                                                                                                                                                                                                                                                  | unknown             | unknown             | NE                                                                                                                                                                                                                                                                                | Hydroxyurea           | NA                 |
| 463   | <i>de novo</i> AML                                       | M4  | 93.5                      | 96                        | 47,XX,+8[16]/47, idem,add(3)(q21)[2]/47, idem,add(3),inv(7)(p15q22)[1]/47, idem,t(8;10)(q24;q24),add(21)(q22)[1]                                                                                                                                                        | 53.5                | 71                  | 47,XX,+8[15]/47, idem,t(1;11)(p32;q13)[1]/46, idem,t(1;11),t(3;13)(q26.2;q34),t(5;6)(q13;q27),-18[1]/47, idem,t(3;17)(q27;q11.2)[1]/47, idem,t(15;15)(q11.2;q22)[1]/47, idem,t(19;19)(p13;q13.1-13.3)[1]                                                                          | Quizartinib           | NA                 |
| 565   | secondary APL                                            | M3  | NE                        | 60                        | t(15;17)(q22;q21)                                                                                                                                                                                                                                                       | 1                   | 6                   | t(15;17)(q22;q21),?add(19)(p13.1)[6]/46, idem,add(1)(p36.1)[3]/46, idem,-4,add(8)(p11.2),+mar[2]/46,XX[4]                                                                                                                                                                         | allo-HSCT, ATO        | 105                |
| 583   | <i>de novo</i> AML                                       | M4  | 46                        | 35                        | 46,XX,inv(16)(p13;1q22)[20]                                                                                                                                                                                                                                             | 20                  | 3                   | 46,XX,inv(16)(p13;1q22)[10]/46,XX[10]                                                                                                                                                                                                                                             | Consolidation therapy | 323                |
| 606   | <i>de novo</i> AML                                       | M2  | 90                        | 88                        | 46,XX,t(7;11)(p15;p15)[20]                                                                                                                                                                                                                                              | 90                  | 94                  | 46,XX,t(7;11)(p15;p15)[17]/19 46, idem,t(13;17)(q14;q11.2)[2]/19                                                                                                                                                                                                                  | Consolidation therapy | 263                |
| 624   | <i>de novo</i> AML                                       | M2  | 84.5                      | 44                        | 46,XX,der(6)t(6;13)(p11;q12),add(13)(q12)[19]/46,XX[1]                                                                                                                                                                                                                  | NE                  | 70                  | NE                                                                                                                                                                                                                                                                                | Consolidation therapy | 79                 |
| 726   | MDS overt AML                                            |     | 67                        | 85                        | 46,XY,t(4;21)(q21;q22),add(7)(q22),add(14)(q24)[20]                                                                                                                                                                                                                     | 93                  | 92.5                | 46,XY,t(4;21)(q21;q22),add(7)(q22),add(14)(q24)[20]                                                                                                                                                                                                                               | CAG                   | NA                 |
| 851   | <i>de novo</i> acute leukemias of ambiguous lineage, NOS |     | 91                        | 89                        | Normal                                                                                                                                                                                                                                                                  | 13                  | 2                   | 46,XY,add(1)(p36.2)[5]/46,XY[15]                                                                                                                                                                                                                                                  | Consolidation therapy | 116                |
| 973   | <i>de novo</i> AML                                       | M2  | 41.5                      | 25                        | Normal                                                                                                                                                                                                                                                                  | 11.5                | 23                  | 46,XX,del(9)(q?)[19]/46,XX[1]                                                                                                                                                                                                                                                     | Consolidation therapy | 105                |
| 979   | <i>de novo</i> AML                                       | M4  | 30.4                      | 0                         | 47,XX,add(2)(p11.2),add(3)(p25),add(7)(q22),-9,?del(11)(q23),-14,-16,-18,-20,+mar,inc[1]/46,XX[19]                                                                                                                                                                      | 20.4                | 0                   | 46,XX,t(1;1)(p36.3;q21),add(2)(p11.2),t(7;14)(q22;q22),add(9)(q34)[2]/46,XX,t(1;12)(p32;p13),add(2),t(7;14)add(9)[1]/46,XY[7]                                                                                                                                                     | allo-HSCT             | 117                |
| 12520 | <i>de novo</i> AML                                       | M1  | 59.5                      | 58                        | Normal                                                                                                                                                                                                                                                                  | 28                  | 1                   | 47,XX,del(2)(q?),+6,t(11;12)(q23;q13),add(21)(q22)[2]/46,XY[18]                                                                                                                                                                                                                   | allo-HSCT             | 342                |
| 12822 | <i>de novo</i> AML                                       | M4  | 78.5                      | 34                        | 46,XX,t(5;11)(q33;q13),del(8)(p11.2),t(11;18)(p15;q21.1),add(16)(p13.3)(p13.3)[19]/46,XX[1]                                                                                                                                                                             | 25.5                | 1                   | 46,XX,t(5;11)(q33;q13),del(8)(p11.2),t(11;18)(p15;q21.1),add(16)(p13.3)[15]/46, idem,t(5;6)(q35;p21)[2]                                                                                                                                                                           | Consolidation therapy | 299                |

## Supplementary Table 6. Primer sequences for fragment analysis and RT-PCR

### Fragment analysis for *FLT3*-ITD

| Direction | Sequence                             |
|-----------|--------------------------------------|
| Forward   | 5'- 6-FAM-CAATTTAGGTATGAAAGCCAGC -3' |
| Reverse   | 5'- CTTTCAGCATTTTGACGGCAACC -3'      |

### RT-PCR for chimeric gene transcripts

| Transcripts           | Direction | Sequence                       |
|-----------------------|-----------|--------------------------------|
| <i>Major BCR-ABL1</i> | Forward   | 5'- GATGCTGACCAACTCGTGTGTG -3' |
|                       | Reverse   | 5'- GGCTTCACACCATTCCCCAT -3'   |
| <i>Minor BCR-ABL1</i> | Forward   | 5'- CAGTCCTTCGACAGCAGCAG -3'   |
|                       | Reverse   | 5'- GGCTTCACACCATTCCCCAT -3'   |
| <i>PML-RARA</i>       | Forward   | 5'- TTGCATCACCCAGGGGAAAG -3'   |
|                       | Reverse   | 5'- AGGGAGGGCTGGGCACTATC -3'   |
| <i>CBFB-MYH11</i>     | Forward   | 5'- TGATCTCCAAGACTGGATG -3'    |
|                       | Reverse   | 5'- AGTTCCGTCTCATACTCGTG -3'   |
| <i>MLL-AF4</i>        | Forward   | 5'- CAGAATCAGGTCCAGAGCAGAG -3' |
|                       | Reverse   | 5'- GATGACGTTCCCTTGCTGAG -3'   |
| <i>MLL-AF9</i>        | Forward   | 5'- GCCTCAGCCACCTACTACAG -3'   |
|                       | Reverse   | 5'- ACGATCTGCTGCAGAATGTGTC -3' |
| <i>MLL-ENL</i>        | Forward   | 5'- GCCTCAGCCACCTACTACAG -3'   |
|                       | Reverse   | 5'- GGAGTTGGACGGGCTTGAC -3'    |
| <i>MLL-ELL</i>        | Forward   | 5'- GCCTCAGCCACCTACTACAG -3'   |
|                       | Reverse   | 5'- CCGATGTTGGAGAGGTAGAA -3'   |
